# Supplementary material for: FGF21 underlies a hormetic response to metabolic stress in methylmalonic acidemia
Source: JCI journal article supplement (doi:10.1172/jci.insight.124351), 2018-12-05
Supplement: sd1 [file 1]

## SUPPLEMENTAL INFORMATION:

### Table of contents:

|                 |    |
|-----------------|----|
| 1. Methods..... | 1  |
| 2. Figures..... | 9  |
| 3. Tables.....  | 13 |

### 1. Methods

#### ***Mouse genotyping***

Mouse genotyping was performed on tail genomic DNA extracted using standard protocols. PCR amplifications were performed across the loxP site of the targeting construct, as well as across the *Mut* cDNA to detect the INS-MCK-*Mut* transgene. Primers used were: 5'-loxP site 5'-CCATTCTGGGAAGGCTTCTA-3' and 3'-loxP site 5'-TGCACAGAGTGCTAGTTTCCA-3'. Detection of the INS-MCK-*Mut* transgene was completed by amplification across the *Mut* cDNA with primers: Forward: 5'-CATGTTGAGAGCTAAGAATC-3' and Reverse: 5'-TAGAAGTTCATTCCAATCCC-3'.

#### ***Diet and Housing***

Mice were housed in a controlled, pathogen-free environment with a 12 hour light/dark cycle and fed ad libitum with standard chow (PicoLab Mouse Diet 20, LabDiet, St. Louis, MO) or a high fat and sugar diet consisting of Diet Induced Obesity Diet (OpenSource Diets™), fruit, and Nutrical® (Tomlyn, Fort Worth, TX). A soft version of the regular chow (Nutra-gel diet, Bio-Serv, Flemington, NJ) was provided for the studies involving AAV administration. For studies involving high protein diet a 70% (wt/wt) casein, or 61% protein chow, (TD.06723, Harlan Laboratories, Madison, WI) was provided ad libitum. Mice were housed on heating strips for thermoneutrality (30°C) as opposed to regular mouse facility room temperature of 24°C, to minimize the effects of cold exposure.

### ***In Vivo Stable Isotope Oxidation Studies***

Stable isotope studies were performed in 4 *Mut*<sup>-/-</sup>;Tg<sup>INS-MCK-*Mut*</sup> and 4 control littermates. Closed circuit, constraint volume respiratory chambers were used to collect and measure enrichment of <sup>13</sup>CO<sub>2</sub> in mice, as described previously (27, 34). Mice received IP injections with tracer amounts (10µl/g of [1mg/ml] tracer solution) of 99.9% <sup>13</sup>C-isotopomers. Aliquots of air were removed every 5-10min, while CO<sub>2</sub> was continuously monitored. <sup>13</sup>CO<sub>3</sub> enrichment was measured by isotope ratio mass spectroscopy (Metabolic Solutions, Nashua, NH). Results were reported as delta:  $\delta = \left( \frac{{}^{13}\text{C}:{}^{12}\text{C}_{\text{sample}}}{{}^{13}\text{C}:{}^{12}\text{C}_{\text{standard}}} - 1 \right) \times 1000$ , where Delta C13 units = per mil (‰) = molecules per thousand more than in the standard. Cumulative percentage of total isotopomer dose metabolized was subsequently calculated, using the formula: Percentage of dose metabolized = total 13C excreted [mmol/dose (mmol) x 100%].

The following stable isotopes were used: <sup>13</sup>C Sodium Propionate, <sup>13</sup>C-Methionine, <sup>13</sup>C- Glycine, <sup>13</sup>C-Pyruvate, <sup>13</sup>C-Octanoate, <sup>13</sup>C-α-Ketoisocaproic Acid, <sup>13</sup>C-Leucine, <sup>13</sup>C-Acetate, <sup>13</sup>C-Phenylalanine. Stable isotopomers were purchased from Cambridge Isotope Laboratories. Variables were compared for each substrate and time point using a two-sided unpaired t-test and considered statistically significant at *p*<0.05.

### ***Clinical Chemistry screen***

Murine plasma was obtained terminally by retro-orbital blood collection using heparinized glass capillary tubes (Drummond Scientific, Broomall, PA) following intraperitoneal injection of pentobarbital (5mg/ml, dose of 0.2-0.3 ml/10g body weight). The samples were centrifuged (4°C, 10 min, 10,000 rpm), the plasma removed, and stored at -80°C in a screw-top tube for later analysis. Methylmalonic acid (MMA) was analyzed in plasma and urine samples by gas chromatography-mass spectrometry with stable isotopic calibration as previously described.

MMA values were measured in patient plasma samples using liquid chromatography–tandem mass spectrometry stable isotope dilution analysis (Mayo Medical Laboratories). Estimated GFR was

calculated using serum creatinine, BUN, and cystatin-C, using the updated CKID equation. 24-hr urine collections were performed in a subset of patients for calculating creatinine clearance (displayed as milliliters per minute per 1.73 m<sup>2</sup>).

***Western Blot, Enzymatic Activity and ELISA assays***

Tissue samples were homogenized by tissue grinder in the presence of T-PER and Halt protease inhibitor mixture (both Pierce Biotechnology). Lysates were centrifuged at 10,000 rpm for 10 min at 4 °C, and supernatants were collected. 20 - 30 µg of clarified protein extract were analyzed by Western blot using an affinity-purified, rabbit polyclonal antisera raised against the murine Mut enzyme at a dilution of 1:1,000. The Complex III subunit Core 2 monoclonal antibody was used as a loading control at a dilution of 1:3,000 (MS304; MitoSciences, Eugene, OR). Horseradish peroxidase labeled anti-rabbit IgG (NA934VS; Amersham Biosciences, Piscataway, NJ) or anti-mouse IgG (NA931VS; Amersham) were used as the secondary antibody at a dilution of 1:10,000 or 1:30,000, respectively. Signal was visualized using the SuperSignal West Pico chemiluminescence substrate (34080; Thermo Scientific, Rockford, IL). Protein bands were quantified using ImageJ software (NIH).

To determine mitochondrial respiratory complex activity 40-70 mg of tissue was homogenized in CPT (0.5 M Tris-HCl, 0.15 M KCl; pH 7.5) and centrifuged at 2,500 × g for 20 min at 4 °C. Resulting supernatant was used for protein quantification, detection, and enzymatic activity. 10% extracts of CPT solution were used to measure Complex I activity by oxidation of NADH, and cytochrome c oxidase (COX or complex IV) reduction of cytochrome c at 340 and 550 nm respectively.

Plasma FGF21 concentrations (pg/ml) were measured by quantikine ELISA (DF2100 for human and MF2100 for the mouse assay, R&D Systems and F2131-KO1 for human Intact FGF21, Eagle Biosciences). Specimens, standards and reagents were prepared according to the manufacturer's instructions. All samples were measured in duplicate. Samples above 4,000pg/ml required several serial

dilutions- 10, 20 and 40x - to achieve levels within the reference range. Normal levels according to the manufacturer are for human heparin plasma mean = 186pg/ml, (N = 35, range ND-1012), while for mouse heparin plasma concentrations was 877pg/ml (N = 20, range 283 – 2280). Correlations are presented without measurements for FGF21 over 10,000pg/ml that were originally outside the range of the assay and necessitated serial dilutions to reach an approximated concentration.

### ***Methylmalonyl-CoA mutase (MCM) tissue enzymatic activity by reverse phase HPLC.***

Hepatic tissue was cut in pieces, immediately frozen into liquid nitrogen and stored at -80°C until use. On the day of analysis, a small volume (~30 µL) was used to measure protein concentration by the method of Bradford using bovine serum albumin as standard (Bio-Rad protein assay kit, Bio-Rad Laboratories (Canada) Ltd, Mississauga ON, Canada). Then, the remainder of the homogenate was diluted with distilled water to obtain the chosen protein concentration for the assay. A stock solution of methylmalonyl-CoA (1 mM) was prepared in 300 mM of tris-phosphate buffer, pH 7.5; this solution was aliquoted and kept at -30°C. Thus, calibration solutions of methylmalonyl-CoA could be prepared by diluting the stock solution in 100 mmol/L phosphate buffer, pH 4.0. The succinyl-CoA calibration solutions (stock, 500 µM) were prepared in 200 mmol/L phosphoric acid, pH 1.8, aliquoted and stored at -30°C. A solution of AdoCbl (1 mM) for the determination of total enzyme activity was also prepared in distilled water, protected against light inactivation and stored at -30°C. All reagents were purchased from Sigma-Aldrich (Canada Ltd, Oakville, ON, Canada)

The HPLC analyses were carried out on an Agilent technology system consisting of two proStar 210 pumps, 320 UV detector and 420 AutoSampler. The Agilent Poroshell 120 EC-C18, 2.7 µm, 3.0 mm × 100 mm threaded column was heated at 40°C with a HPLC column heater Croco-cil®. The assay reaction mixture for total MCM activity contained, in a total volume of 150 µL, 16 to 333 µg of liver homogenate protein (60 µL), 30 µL of AdoCbl (1 mM), and 60 µL of methylmalonyl-CoA (1 mM). The liver homogenate was first incubated with AdoCbl for 5 minutes at 37°C before initiating the enzyme reaction



by adding methylmalonyl-CoA. The tubes were again incubated at 37°C for 0 to 30 minutes and the reaction was stopped by adding 50 mL of trichloroacetic acid (TCA; 100 g/L). The tubes were centrifuged at 13 000g for 1 min. The supernatant was collected and filtered in amber glass vials through a 0.45 µm syringe-operated filter units. A volume of 20 µL of sample was injected in the HPLC system. Blanks were included in every run. The reverse phase column was equilibrated with 56% solvent A (100 mM acetic acid in 100 mM of sodium phosphate buffer, pH 7.0) and 44% solvent B (18% v/v methanol in solvent A). The method consisted in a linear methanol gradient: 0 – 3 min (44% solvent B); 3 – 9 min (44 – 75%); 9 – 12 min (75 – 100%); 12 – 17 min (100 – 44%); and 17 – 35 min (44%) with a flow rate of 0.2 mL/min. The solvent A was filtered through 0.2 µm membrane. The compounds were detected at 254 nm. The optimization and validation of the method was described previously(33) .

### ***Histology, immunohistochemistry and electron microstopy***

Tissues for histology were fixed in 10% formalin, embedded into paraffin blocks and subsequently stained with H&E. For immunohistochemistry, liver tissues were snap-frozen in liquid-nitrogen-cooled isopentane. The tissues were cryosectioned and stained for COX and SDH activities, as previously described (82). To visualize histological features and mitochondrial abnormalities, frozen sections of kidney and liver were cut and stained with COX, SDH, and combined COX-SDH reactions. These sections were examined with an Olympus BX51 microscope with a computer-assisted image analysis system. H&E staining was also performed on paraffin sections of various tissues by Histoserv, Inc, Germantown, MD.

Transmission electron microscopy was performed on mouse tissues fixed at 4°C in 2% glutaraldehyde in 0.1M cacodylate buffer (pH 7.4) and washed with cacodylate buffer. The tissues were fixed with 2% OsO<sub>4</sub> for two hours, washed again with 0.1M cacodylate buffer three times, washed with water and placed in

1% uranyl acetate for one hour. The tissues were subsequently serially dehydrated in ethanol and propylene oxide and embedded in EMBed 812 resin (Electron Microscopy Sciences, Hatfield, PA, USA). Thin sections, approximately 80 nm thick, were obtained by utilizing the Leica ultracut-UCT ultramicrotome (Leica, Deerfield, IL, USA) and placed onto 300 mesh copper grids and stained with saturated uranyl acetate in 50% methanol and then with lead citrate. The grids were viewed in the JEM-1200EXII electron microscope (JEOL Ltd, Tokyo, Japan) at 80 kV and images were recorded on the XR611M, mid mounted, 10.5Mpixel, CCD camera (Advanced Microscopy Techniques Corp, Danvers, MA, USA).

### ***FITC-Inulin Clearance Studies***

Glomerular filtration rate (GFR) was assessed by the single-injection FITC-inulin clearance method, as described previously (27). Briefly, serial plasma collections were taken from tail cuts following injection of FITC-inulin and fluorescence measurements of resultant samples were used to determine the rate of decay in comparison to standard curve. Under 1-3% isoflurane anesthesia, mice were given a single bolus retro-orbital injection of 2.5% FITC-inulin (3.74  $\mu$ l/g body weight). Heparinized blood collections (5  $\mu$ l volume) from tail cuts were performed at 3, 7, 10, 15, 35, 55, and 75 minutes. Plasma was separated under centrifugation (3 min, 10,000 rpm). Since pH affects FITC fluorescence values, each plasma sample was buffered by mixing 1  $\mu$ l plasma with 9  $\mu$ l 500 mM HEPES solution (pH 7.4). The amount of FITC label present in the samples was then measured using a fluorospectrometer at 538-nm emission (Thermo Scientific, NanoDrop 3300). A two-compartment clearance model was used to calculate GFR. Plasma fluorescence data were fit to a two-phase exponential decay curve using nonlinear regression (GraphPad Prism, GraphPad Software, San Diego, CA). GFR ( $\mu$ l/min) was calculated using the equation:  $GFR = I/(A/\alpha + B/\beta)$ , where I is the amount of FITC-inulin delivered by injection, A and B are the y - intercept values of the two decay rates, and  $\alpha$  and  $\beta$  are the decay constants for the distribution and elimination phases, respectively (83, 84).

**Microarray experiments**

For transcriptome analysis liver tissue RNA expression was studied in livers from the following 4 conditions: heterozygote *Mut*<sup>+/-</sup>;Tg<sup>INS-MCK-*Mut*</sup> mice at baseline and after 12 hrs of fasting, mutant *Mut*<sup>-/-</sup>;Tg<sup>INS-MCK-*Mut*</sup> mice at baseline and after 8-12 hrs of fasting. Four mice in each genotype group and fed or fasting state were sacrificed for liver and RNA extraction. All the mice used in this study were males, at 4 months of age. After organ removal, livers were snap frozen in liquid nitrogen. Total RNA from liver tissue was extracted using the RNA mini kit (74104 Qiagen). cDNA was labeled by the GeneChip Ambion WT expression kit for 1.0 ST chips (4411973; Ambion) and hybridized to Affymetrix GeneChip Mouse Gene 1.0ST Arrays (901168; Affymetrix) according to the manufacturer's instructions. Data were analyzed using Partel Genomics Suite software (Partek) and pathway analysis was conducted using Ingenuity Pathway analysis (Ingenuity Systems).

Principal component analysis was performed generating histograms to assess the biological variability of the microarrays. Using hierarchical cluster analysis, the transcriptomes of the 4 different groups of mice showed satisfactory segregation and differential clustering. Baseline, non-fasting mutant mice showed the lower co-segregation, as expected, given their mixed, non-standardized dietary composition (regular chow, supplemented by fruit/enecal and high fat, for caloric suport).

To investigate biological patterns, we performed canonical pathway enrichment analysis using the Ingenuity Pathway Analysis Pathway (QIAGEN bioinformatics, Redwood City 1700 Seaport Blvd #3 Redwood City CA 94063) and calculated a P value for each pathway that was adjusted for multiple testing using the Benjamini-Hochberg method. A P-value of 0.05 after correcting for multiple comparisons was used to determine statistical significant changes.

The microarray data were deposited in Gene Epxression Omnibus (GEO) database (accession No: GSE118862).

**Quantitative real-time PCR analysis.** Total RNA from frozen tissue was extracted using the RNeasy Mini Kit (74104; Qiagen, Valencia, CA). DNase digestion was performed using DNA-free (AM1906; Ambion, Austin, TX) and 2µg of RNA was reverse transcribed using the High Capacity cDNA Kit (4368814; Applied Biosystems, Foster City, CA). Taqman gene expression assays were performed in triplicate according to the manufacturer's instructions using the Fast-Universal PCR Master Mix (4352042, Applied Biosystems) and the Applied Biosystems 7500 Fast Real-Time PCR System. TaqMan probes specific to selected genes were used and listed in Supplemental Table 3 (Applied Biosystems, Foster City, CA). mRNA expression levels were normalized to GAPDH (Mm99999915\_g1; Applied Biosystems) and quantification of relative gene expression, presented as percentage of the relevant baseline, was calculated using the  $2^{-[\Delta][\Delta]CT}$  (comparative threshold) method.

## 2. Figures

### Supplemental Figure 1.

#### Generation of the $Mut^{-/-};Tg^{INS-MCK-Mut}$ murine model.

**(A)** Schematic representation of the *Mut* knockout allele and the INS-MCK-*Mut* construct used to produce the transgenic model,  $Mut^{-/-};Tg^{INS-MCK-Mut}$ . **(B)** Quantitative RT-PCR analysis of *Mut* mRNA expression in the muscle and liver. Results are provided as percentage of the levels obtained in wild-type ( $Mut^{+/+}$ ) animals, corrected for *Gapdh* expression (mean  $\pm$  SEM; n = 3–5; P = 0.0027). The muscle *Mut* mRNA expression from the transgene was  $19,492.5 \pm 2,962.5$  % and the heart was  $2,654 \pm 1666$  % compared to their  $Mut^{+/+}$  littermates (P=0.0027, N=5), while there was no detectable *Mut* mRNA in the liver ( $0.0928 \pm 0.04$  % compared to wild type), kidney or brain tissues. **(C)** *Mut* (78 kDa) was detected in whole-tissue lysates from  $Mut^{-/-};Tg^{INS-MCK-Mut}$  muscle and heart, but not in liver, kidney or brain protein extracts. The Complex III subunit Core 2 used as a loading control indicates that 15-fold less protein was loaded for the muscle tissue in order to obtain a regular size band after chemiluminescence, because of the strength of the signal. **(D)** The liver transgenic model ( $Mut^{-/-};Tg^{INS-Alb-Mut}$ ) exhibits significant higher percent control propionate oxidation ( $78.04 \pm 22.1$  % control) compared to the  $Mut^{-/-};Tg^{INS-MCK-Mut}$  mice ( $36.2 \pm 7.1$  % control, P=0.0007). **(E)** At 3-4 mo of age,  $Mut^{-/-};Tg^{INS-MCK-Mut}$  mice appear active and well, but are consistently smaller than heterozygote littermates, whether fed regular chow or a high fat and carbohydrate diet.

### Supplemental Figure 2.

#### Hepatic pathological and ultrastructural changes in $Mut^{-/-};Tg^{INS-MCK-Mut}$ animals and MMA patients

**(A)** Hepatic pathology in mutant mice (panel b) was notable for swollen hepatocytes with increased eosinophilia and scattered Mallory bodies (inset, panel b). Hepatocytes contained numerous cytoplasmic eosinophilic vacuoles consistent with megamitochondria (yellow arrow, panel c). Steatosis was observed

in heterozygote animals reared on the same high fat and carbohydrate diet (panel a). No significant disruption of hepatic lobe architecture, fibrotic or cirrhotic changes were observed. Hematoxylin and eosin staining of liver sections from a 4-month-old mouse are shown, scale bars: 20-100µm). **(B)** Explanted livers from patients undergoing a liver transplantation displayed mostly macrovesicular periportal steatosis, with lipid laden stellate cells (panel b, yellow arrowhead) and occasional lipofuscin pigment granules (inset, panel b). Mitochondria with a reduction or loss of matrix density, unusual size/shape and shortened, disorganized cristae are invariably present in liver pathology examinations by electron microscopy (B, panels d-h). In some patients, liver ultrastructure revealed complex cytoplasmic structures with inclusions of various size and density engulfed by membranes suggestive of autophagosomes (B, panel i).

### Supplemental Figure 3.

#### Hepatic mitochondrial dysfunction.

**(A)** Immunohistochemistry for Cox and Sdh on liver section of mutant mice revealed significantly decrease in Cox staining (10x) compared to the heterozygote littermates. **(B)** Cytochrome c oxidase enzymatic activity in the livers of the  $Mut^{-/-};Tg^{INS-MCK-Mut}$  mice were significantly lower than control mice, and similar to the  $Mut^{-/-}$  livers (n=3 per group). **(C and D)** Cumulative percentage of total isotopomer dose metabolized in 30min after intraperitoneal injection of a tracer dose (10µl/g of [1mg/ml] tracer solution) is depicted for methionine and glycine 1-<sup>13</sup>C isotopomer. Oxidation of both amino acids was perturbed in the  $Mut^{-/-};Tg^{INS-MCK-Mut}$  mice compared to their heterozygote littermates consistent with impaired activity of the glycine cleavage system and the mitochondrial steps of methionine metabolism caused by a shift in the NAD:NADH balance in the mitochondria.

### Supplemental Figure 4.

#### Renal pathology in $Mut^{-/-};Tg^{INS-MCK-Mut}$ mice.

(A) Renal pathology showed mild interstitial nephritis and tubular vacuoles (white arrow) with accumulation of pigment in some proximal tubules' brush border (scale bars: 20mm, panel a). On electron microscopy, proximal tubules showed increased number of abnormally shaped mitochondria with decreased matrix density as opposed to their heterozygote littermates (scale bars: 1mm, panel b and c). (B) Plasma Lipocalin-2 (Lcn2) concentrations were elevated in  $Mut^{-/-};Tg^{INS-MCK-Mut}$  mice on regular chow at 4-5 months of age compared to their heterozygote littermates ( $129.1 \pm 22.09\text{ng/ml}$  vs  $75.21 \pm 6.41$ ,  $n=6$  each group,  $P=0.0413$ ). (C) Plasma Lcn2 showed a negative trend with the glomerular filtration rate measured by the FITC inulin plasma decay method ( $r = -0.661$ ,  $R^2 = 0.45$ ,  $P=0.10$ ).

### Supplemental Figure 5.

#### Biochemical and other findings in $Mut^{-/-};Tg^{INS-MCK-Mut}$ mice.

(A) Serum chemistries, including BUN, liver function testing, amylase, CK and LDH. Significant differences we only observed in alkaline phosphatase and amylase levels between  $Mut^{-/-};Tg^{INS-MCK-Mut}$  mice and their heterozygote littermates. (B) Two-hour glucose tolerance test in  $Mut^{-/-};Tg^{INS-MCK-Mut}$  mice, showed no difference in glucose control from heterozygote littermates on the same high fat/carbohydrate diet. (C) Hematoxylin-eosin stain of the quadriceps muscle shows no abnormal findings in  $Mut^{-/-};Tg^{INS-MCK-Mut}$  mice.

### Supplemental Figure 6.

#### Fasting challenge.

(A) Blood glucose monitoring during the overnight fasting study in male and female  $Mut^{-/-};Tg^{INS-MCK-Mut}$  mice detected hypoglycemia in the smaller female mice between 15-16hrs of fasting. Mice were euthanized for tissue collection at this time point. (B) The dendrogram represents hierarchical clustering of genes with similar expression pattern in the microarray experiments in liver tissues. Genes upregulated in the  $Mut^{-/-};Tg^{INS-MCK-Mut}$  mice as opposed to control animals are indicated in Red and

downregulated in Blue. Microarrays were performed in 2 groups of animals, mutant and control mice, in two conditions, baseline and fasting states. The scale (red to blue) represents the ratios of differential expression based on signal intensity.

**Longitudinal Fgf21 values:** (C) Samples obtained in a small number over time suggest that values are higher at weaning, even for some heterozygote animals, and then gradually increase after the first month in the  $Mut^{-/-};Tg^{INS-MCK-Mut}$  transgenic mice.

### Supplemental Figure 7.

#### Validation of selected up- and down-regulated genes in the microarray experiment

Hepatic expression of selected genes in the unfasted and fasted state in heterozygote and mutant animals is depicted. An exaggerated response was often seen in  $Mut^{-/-};Tg^{INS-MCK-Mut}$  mice in several pathways (for example: *Gadd45b*, *Pdk4*), while for others a divergent response was observed, with genes that are normally downregulated being significantly induced (*Gstm3*, *Slc7A11*, *Rragd*).

Downregulation of *Fasn* and *Hsd3b2* was consistent between  $Mut^{-/-};Tg^{INS-MCK-Mut}$  and their heterozygote littermates.

### Supplemental Figure 8.

#### Plasma total and intact FGF21 and correlations with other biochemical parameters.

(A) Total and intact (active) FGF21 were measured in the same samples (N=38). Intact FGF21 ranged from 33.92 to 18,235 pg/ml ( $2,262 \pm 3,636$ , mean  $\pm$  SD). (B) Delta Total-Intact FGF21 showed a weak correlation ( $R^2=0.18$ ,  $r=0.42$ ,  $P=0.014$ ) with renal function. (C) Serial FGF21 measurements before, during and after a metabolic crisis in two MMA siblings showed massive temporary increases in serum FGF21 concentrations that returned to pre-crisis levels upon recovery. (D) Plasma FGF21 correlated positively with plasma amino acids (glycine:  $r=0.36$ ,  $P=0.0227$ ,  $R^2=0.132$  and alanine:  $r=0.41$ ,  $P=0.0079$ ,



$R^2=0.175$ , solid circles vs. clear square symbols, respectively), as well as (E) with urinary F2-isoprostanes ( $r=0.39$ ,  $P=0.03$ ,  $R^2=0.154$ ). (F) There was a negative correlation with plasma valine ( $r=-0.345$ ,  $P=0.03$ ,  $R^2=0.12$ ).

### 3. Tables:

#### Supplemental Table 1. Differentially expressed genes. Fold change (+/- 2.5-fold or higher) in mRNA expression of mutant vs. heterozygous mice in the fasting state.

Highlighted genes were validated by RT-PCR, see Supplemental Figure 7.

| Gene ID                                                                  | Gene name description                                                                             | Fold change |
|--------------------------------------------------------------------------|---------------------------------------------------------------------------------------------------|-------------|
| <u>Up-regulated in <i>Mut</i><sup>-/-</sup>;Tg<sup>INS-MCK-Mut</sup></u> |                                                                                                   |             |
| <i>Cyp2b13</i>                                                           | cytochrome P450, family 2, subfamily b, polypeptide 13                                            | 17.220      |
| <b><i>Lepr</i></b>                                                       | leptin receptor                                                                                   | 13.693      |
| <i>Cyp2b9</i>                                                            | cytochrome P450, family 2, subfamily b, polypeptide 9                                             | 11.378      |
| <b><i>Slc7a11</i></b>                                                    | solute carrier family 7 (cationic amino acid transporter, y+ system), member 11                   | 11.193      |
| <i>Cyp2a22</i>                                                           | cytochrome P450, family 2, subfamily a, polypeptide 22                                            | 8.403       |
| <b><i>Asns</i></b>                                                       | asparagine synthetase (glutamine-hydrolyzing)                                                     | 7.674       |
| <i>Aqp7</i>                                                              | aquaporin 7                                                                                       | 6.147       |
| <b><i>Gstm3</i></b>                                                      | glutathione S-transferase, mu 3                                                                   | 5.765       |
| <i>Prss8</i>                                                             | protease, serine 8 (prostasin)                                                                    | 5.134       |
| <b><i>Abcc4</i></b>                                                      | ATP-binding cassette, sub-family C (CFTR/MRP), member 4                                           | 4.627       |
| <i>Cd63</i>                                                              | CD63 antigen                                                                                      | 4.570       |
| <b><i>Socs2</i></b>                                                      | suppressor of cytokine signaling 2                                                                | 4.520       |
| <i>Serpina7</i>                                                          | serine (or cysteine) peptidase inhibitor, clade A (alpha-1 antiproteinase, antitrypsin), member 7 | 4.246       |
| <i>Fmo3</i>                                                              | flavin containing monooxygenase 3                                                                 | 4.245       |
| <i>Fabp5</i>                                                             | fatty acid binding protein 5, epidermal                                                           | 4.162       |
| <i>Myc</i>                                                               | myelocytomatosis oncogene                                                                         | 3.962       |
| <i>Ly6d</i>                                                              | lymphocyte antigen 6 complex, locus D                                                             | 3.910       |
| <i>Psat1</i>                                                             | phosphoserine aminotransferase 1                                                                  | 3.901       |
| <i>Itga6</i>                                                             | integrin alpha 6                                                                                  | 3.876       |
| <i>Nipal1</i>                                                            | NIPA-like domain containing 1                                                                     | 3.718       |
| <i>Prrg4</i>                                                             | proline rich Gla (G-carboxyglutamic acid) 4 (transmembrane)                                       | 3.709       |
| <i>Slc35f2</i>                                                           | solute carrier family 35, member F2                                                               | 3.681       |

|                       |                                                                  |       |
|-----------------------|------------------------------------------------------------------|-------|
| <i>Ucp2</i>           | uncoupling protein 2 (mitochondrial, proton carrier)             | 3.610 |
| <i>Fabp5</i>          | fatty acid binding protein 5, epidermal                          | 3.585 |
| <i>Nupr1</i>          | nuclear protein transcription regulator 1                        | 3.570 |
| <i>Acot2</i>          | acyl-CoA thioesterase 2                                          | 3.569 |
| <i>Usp18</i>          | ubiquitin specific peptidase 18                                  | 3.429 |
| <i>Ccnd1</i>          | cyclin D1                                                        | 3.408 |
| <i>Tuba8</i>          | tubulin, alpha 8                                                 | 3.328 |
| <i>Car2</i>           | carbonic anhydrase 2                                             | 3.317 |
| <b><i>Slc7a11</i></b> | solute carrier family 22 (organic cation transporter), member 26 | 3.317 |
| <b><i>Pdk4</i></b>    | pyruvate dehydrogenase kinase, isoenzyme 4                       | 3.095 |
| <i>Cpt1b</i>          | carnitine palmitoyltransferase 1b, muscle                        | 3.087 |
| <i>Ntf3</i>           | neurotrophin 3                                                   | 3.057 |
| <i>Abcd2</i>          | ATP-binding cassette, sub-family D (ALD), member 2               | 3.041 |
| <i>Hmox1</i>          | heme oxygenase 1                                                 | 2.994 |
| <i>Sqle</i>           | squalene epoxidase                                               | 2.967 |
| <i>Slc22a27</i>       | solute carrier family 22, member 27                              | 2.927 |
| <b><i>Rragd</i></b>   | Ras-related GTP binding D                                        | 2.899 |
| <i>S100a11</i>        | S100 calcium binding protein A11                                 | 2.847 |
| <i>Cyp11b1</i>        | cytochrome P450, family 11, subfamily b, polypeptide 1           | 2.814 |
| <i>Vldlr</i>          | very low density lipoprotein receptor                            | 2.811 |
| <i>Cln6</i>           | ceroid-lipofuscinosis, neuronal 6                                | 2.737 |
| <i>App</i>            | amyloid beta (A4) precursor protein                              | 2.694 |
| <i>Dhrs9</i>          | dehydrogenase/reductase (SDR family) member 9                    | 2.682 |
| <i>Pfkfb</i>          | phosphofructokinase, platelet                                    | 2.661 |
| <i>Acsl4</i>          | acyl-CoA synthetase long-chain family member 4                   | 2.651 |
| <i>Fabp3</i>          | fatty acid binding protein 3, muscle and heart                   | 2.631 |
| <i>Sgk1</i>           | serum/glucocorticoid regulated kinase 1                          | 2.627 |
| <i>Renbp</i>          | renin binding protein                                            | 2.592 |
| <i>Adra2a</i>         | adrenergic receptor, alpha 2a                                    | 2.550 |
| <i>Morc4</i>          | microorchidia 4                                                  | 2.500 |
| <b><i>Fgf21</i></b>   | <i>Fibroblast growth factor 21</i>                               | 1.519 |

Down-regulated in *Mut<sup>-/-</sup>;Tg<sup>INS-MCK-Mut</sup>*

|                |                                                                                |         |
|----------------|--------------------------------------------------------------------------------|---------|
| <i>Elovl3</i>  | elongation of very long chain fatty acids (FEN1/Elo2, SUR4/Elo3, yeast)-like 3 | -13.414 |
| <i>Orm1</i>    | orosomucoid 1                                                                  | -12.533 |
| <i>Nnmt</i>    | nicotinamide N-methyltransferase                                               | -10.919 |
| <i>Slco1a1</i> | solute carrier organic anion transporter family, member 1a1                    | -9.778  |
| <i>Obp2a</i>   | odorant binding protein 2A ( <i>Lcn13</i> )                                    | -8.909  |
| <i>Slc3a1</i>  | solute carrier family 3, member 1                                              | -8.471  |
| <i>C9</i>      | complement component 9                                                         | -7.428  |
| <i>Pigr</i>    | polymeric immunoglobulin receptor                                              | -6.746  |

|                      |                                                                              |        |
|----------------------|------------------------------------------------------------------------------|--------|
| <i>Orm3</i>          | orsomucoid 3                                                                 | -6.603 |
| <i>Saa2</i>          | serum amyloid A 2                                                            | -6.538 |
| <i>Cyp7b1</i>        | cytochrome P450, family 7, subfamily b, polypeptide 1                        | -4.891 |
| <i>Ces3b</i>         | carboxylesterase 3B                                                          | -4.631 |
| <b><i>Hsd3b2</i></b> | hydroxy-delta-5-steroid dehydrogenase, 3 beta- and steroid delta-isomerase 2 | -3.886 |
| <i>Ido2</i>          | indoleamine 2,3-dioxygenase 2                                                | -3.459 |
| <i>Mut</i>           | methylmalonyl-Coenzyme A mutase                                              | -3.448 |
| <i>Susd4</i>         | sushi domain containing 4                                                    | -3.285 |
| <i>Saa4</i>          | serum amyloid A 4                                                            | -3.257 |
| <i>Mup3</i>          | major urinary protein 3                                                      | -3.209 |
| <i>Slc8a1</i>        | solute carrier family 8 (sodium/calcium exchanger), member 1                 | -3.193 |
| <i>C6</i>            | complement component 6                                                       | -3.113 |
| <i>Sucnr1</i>        | succinate receptor 1                                                         | -2.997 |
| <i>Scnn1a</i>        | sodium channel, nonvoltage-gated 1 alpha                                     | -2.989 |
| <i>Alas2</i>         | aminolevulinic acid synthase 2, erythroid                                    | -2.893 |
| <i>P2ry4</i>         | pyrimidinergic receptor P2Y, G-protein coupled, 4                            | -2.842 |
| <i>Car1</i>          | carbonic anhydrase 1                                                         | -2.820 |
| <i>Abat</i>          | 4-aminobutyrate aminotransferase                                             | -2.788 |
| <i>Acnat2</i>        | acyl-coenzyme A amino acid N-acyltransferase 2                               | -2.788 |
| <i>Nox4</i>          | NADPH oxidase 4                                                              | -2.769 |
| <i>Arrdc3</i>        | arrestin domain containing 3                                                 | -2.762 |
| <i>Mbl2</i>          | mannose-binding lectin (protein C) 2                                         | -2.747 |
| <i>Fam55b</i>        | neurexophilin and PC-esterase domain family, member 2                        | -2.710 |
| <i>Cyp2c54</i>       | cytochrome P450, family 2, subfamily c, polypeptide 54                       | -2.651 |
| <i>Nr0b2</i>         | nuclear receptor subfamily 0 group B member 2                                | -2.617 |
| <i>Hsd3b5</i>        | hydroxy-delta-5-steroid dehydrogenase, 3 beta- and steroid delta-isomerase 5 | -2.614 |
| <i>Fitm1</i>         | fat storage-inducing transmembrane protein 1                                 | -2.614 |
| <i>Cyp2d9</i>        | cytochrome P450, family 2, subfamily d, polypeptide 9                        | -2.584 |
| <i>Cyp2u1</i>        | cytochrome P450, family 2, subfamily u, polypeptide 1                        | -2.561 |
| <i>Srd5a1</i>        | steroid 5 alpha-reductase 1                                                  | -2.554 |
| <i>Bdh2</i>          | 3-hydroxybutyrate dehydrogenase, type 2                                      | -2.529 |
| <i>Mfsd2a</i>        | major facilitator superfamily domain containing 2A                           | -2.528 |
| <i>Hsd3b3</i>        | hydroxy-delta-5-steroid dehydrogenase, 3 beta- and steroid delta-isomerase 3 | -2.501 |

**Supplemental Table 2. Differentially expressed genes. Fold change (+/- 2.5-fold or higher) in mRNA expression of mutant vs. heterozygous mice at baseline.**

Highlighted genes were validated by RT-PCR, see Supplemental Figure 7.

| Gene ID                                                                  | Gene name description                                                           | Fold change |
|--------------------------------------------------------------------------|---------------------------------------------------------------------------------|-------------|
| <b>Up-regulated in <i>Mut<sup>+/-</sup>;Tg<sup>INS-MCK-Mut</sup></i></b> |                                                                                 |             |
| <i>Cyp2b13</i>                                                           | cytochrome P450, family 2, subfamily b, polypeptide 13                          | 22.737      |
| <i>Cyp2b9</i>                                                            | cytochrome P450, family 2, subfamily b, polypeptide 9                           | 15.493      |
| <i>Cyp2a22</i>                                                           | cytochrome P450, family 2, subfamily a, polypeptide 22                          | 12.580      |
| <i>Slc7a11</i>                                                           | solute carrier family 7 (cationic amino acid transporter, y+ system), member 11 | 10.993      |
| <i>Igfbp1</i>                                                            | insulin-like growth factor binding protein 1                                    | 7.027       |
| <i>Asns</i>                                                              | asparagine synthetase (glutamine-hydrolyzing)                                   | 6.168       |
| <i>Lepr</i>                                                              | leptin receptor                                                                 | 5.876       |
| <i>Mt1</i>                                                               | metallothionein 1                                                               | 5.876       |
| <i>Mt2</i>                                                               | metallothionein 2                                                               | 5.795       |
| <i>Fmo3</i>                                                              | flavin containing monooxygenase 3                                               | 5.301       |
| <b><i>Pdk4</i></b>                                                       | pyruvate dehydrogenase kinase, isoenzyme 4                                      | 4.696       |
| <i>Abcd2</i>                                                             | ATP-binding cassette, sub-family D (ALD), member 2                              | 4.688       |
| <b><i>Abcc4</i></b>                                                      | ATP-binding cassette, sub-family C (CFTR/MRP), member 4                         | 4.444       |
| <i>Aqp7</i>                                                              | aquaporin 7                                                                     | 4.362       |
| <i>Cdkn1a</i>                                                            | cyclin-dependent kinase inhibitor 1A (P21)                                      | 4.303       |
| <i>Lcn2</i>                                                              | lipocalin 2                                                                     | 4.039       |
| <i>Slc16a5</i>                                                           | solute carrier family 16 member 5                                               | 4.003       |
| <i>Cyp39a1</i>                                                           | cytochrome P450, family 39, subfamily a, polypeptide 1                          | 3.985       |
| <i>Acot2</i>                                                             | acyl-CoA thioesterase 2                                                         | 3.893       |
| <i>Serpina7</i>                                                          | serine (or cysteine) peptidase inhibitor, clade A                               | 3.837       |
| <b><i>Gstm3</i></b>                                                      | glutathione S-transferase, mu 3                                                 | 3.793       |
| <i>Fmo2</i>                                                              | flavin containing monooxygenase 2                                               | 3.768       |
| <i>Ccnd1</i>                                                             | cyclin D1                                                                       | 3.642       |
| <i>Atp6v0d2</i>                                                          | ATPase, H+ transporting, lysosomal V0 subunit D2                                | 3.617       |
| <i>Tuba8</i>                                                             | tubulin, alpha 8                                                                | 3.534       |
| <i>Itga6</i>                                                             | integrin alpha 6                                                                | 3.505       |
| <i>Prss8</i>                                                             | protease, serine, 8 (prostasin)                                                 | 3.494       |
| <i>Ucp2</i>                                                              | uncoupling protein 2 (mitochondrial, proton carrier)                            | 3.475       |
| <i>Agpat9</i>                                                            | 1-acylglycerol-3-phosphate O-acyltransferase 9                                  | 3.419       |

|                       |                                                |       |
|-----------------------|------------------------------------------------|-------|
| <i>Nipa1</i>          | NIPA-like domain containing 1                  | 3.386 |
| <i>Prrg4</i>          | proline rich Gla (G-carboxyglutamic acid) 4    | 3.268 |
| <b><i>Gadd45b</i></b> | growth arrest and DNA-damage-inducible 45 beta | 3.207 |
| <b><i>Fgf21</i></b>   | fibroblast growth factor 21                    | 3.202 |
| <i>Vldlr</i>          | very low density lipoprotein receptor          | 3.160 |
| <b><i>Rragd</i></b>   | Ras-related GTP binding D                      | 3.135 |
| <i>Slc35f2</i>        | solute carrier family 35, member F2            | 3.093 |

Down-regulated in *Mut*<sup>-/-</sup>;Tg<sup>INS-MCK-Mut</sup>

|                      |                                                                                |         |
|----------------------|--------------------------------------------------------------------------------|---------|
| <i>Hsd3b5</i>        | hydroxy-delta-5-steroid dehydrogenase, 3 beta                                  | -38.006 |
| <i>Serpina4-ps1</i>  | serine (or cysteine) peptidase inhibitor, clade A, member 4, pseudogene 1      | -33.691 |
| <i>Elovl3</i>        | elongation of very long chain fatty acids (FEN1/Elo2, SUR4/Elo3, yeast)-like 3 | -17.967 |
| <i>Lcn13</i>         | lipocalin 13                                                                   | -13.401 |
| <i>Orm1</i>          | orosomucoid 1                                                                  | -8.209  |
| <i>Slco1a1</i>       | solute carrier organic anion transporter family, member                        | -7.999  |
| <i>Cyp7b1</i>        | cytochrome P450, family 7, subfamily b, polypeptide 1                          | -6.793  |
| <i>Mup21</i>         | major urinary protein 21                                                       | -6.245  |
| <i>Slc10a2</i>       | solute carrier family 10, member 2                                             | -5.079  |
| <i>C9</i>            | complement component 9                                                         | -4.834  |
| <i>Gm4738</i>        | predicted gene 4738                                                            | -4.695  |
| <i>Slc3a1</i>        | solute carrier family 3, member 1                                              | -4.560  |
| <i>Cyp2u1</i>        | cytochrome P450, family 2, subfamily u, polypeptide 1                          | -4.528  |
| <i>Pigr</i>          | polymeric immunoglobulin receptor                                              | -4.351  |
| <i>Dpy19l3</i>       | dpy-19-like 3 (C. elegans)                                                     | -4.330  |
| <i>Ust</i>           | uronyl-2-sulfotransferase                                                      | -3.963  |
| <i>Nnmt</i>          | nicotinamide N-methyltransferase                                               | -3.930  |
| <i>c</i>             | predicted gene 4956                                                            | -3.912  |
| <b><i>Hsd3b2</i></b> | hydroxy-delta-5-steroid dehydrogenase, 3 beta- and steroid delta-isomerase 2   | -3.873  |
| <i>Cyp8b1</i>        | cytochrome P450, family 8, subfamily b, polypeptide 1                          | -3.834  |
| <i>C6</i>            | complement component 6                                                         | -3.662  |
| <i>Srd5a1</i>        | steroid 5 alpha-reductase 1                                                    | -3.631  |
| <i>Mut</i>           | methylmalonyl-Coenzyme A mutase                                                | -3.406  |
| <i>Gm11437</i>       | predicted gene 11437                                                           | -3.338  |
| <i>Adh6-ps1</i>      | alcohol dehydrogenase 6 (class V), pseudogene 1                                | -3.277  |
| <i>Agxt2l1</i>       | alanine-glyoxylate aminotransferase 2-like 1                                   | -3.040  |
| <i>Sucnr1</i>        | succinate receptor 1                                                           | -3.013  |

**Supplemental Table 3: TaqMan probes for quantitative PCR validation of differentially expressed genes identified by microarray expression analysis**

(presented in supplemental figure 7)

| Gene ID               | Gene name description                                                           | Taqman probe  |
|-----------------------|---------------------------------------------------------------------------------|---------------|
| <b><i>Fgf21</i></b>   | Fibroblast growth factor 21                                                     | Mm00840165_g1 |
| <b><i>Gadd45b</i></b> | growth arrest and DNA-damage-inducible 45 beta                                  | Mm00435123_m1 |
| <b><i>Pdk4</i></b>    | pyruvate dehydrogenase kinase, isoenzyme 4                                      | Mm01166879_m1 |
| <b><i>Gstm3</i></b>   | glutathione S-transferase, mu 3                                                 | Mm00833923_m1 |
| <b><i>Slc7a11</i></b> | solute carrier family 7 (cationic amino acid transporter, y+ system), member 11 | Mm00442530_m1 |
| <b><i>Rragd</i></b>   | Ras-related GTP binding D                                                       | Mm00546741_m1 |
| <b><i>Socs2</i></b>   | suppressor of cytokine signaling 2                                              | Mm00850544_g1 |
| <b><i>Asns</i></b>    | asparagine synthetase (glutamine-hydrolyzing)                                   | Mm00803785_m1 |
| <b><i>Lepr</i></b>    | leptin receptor                                                                 | Mm00440181_m1 |
| <b><i>Abcc4</i></b>   | ATP-binding cassette, sub-family C (CFTR/MRP), member 4                         | Mm01226381_m1 |
| <b><i>Fasn</i></b>    | fatty Acid synthase                                                             | Mm00662319_m1 |
| <b><i>Hsd3b2</i></b>  | hydroxy-delta-5-steroid dehydrogenase, 3 beta- and steroid delta-isomerase 2    | Mm00462685_m1 |

## Supplemental Figure 1

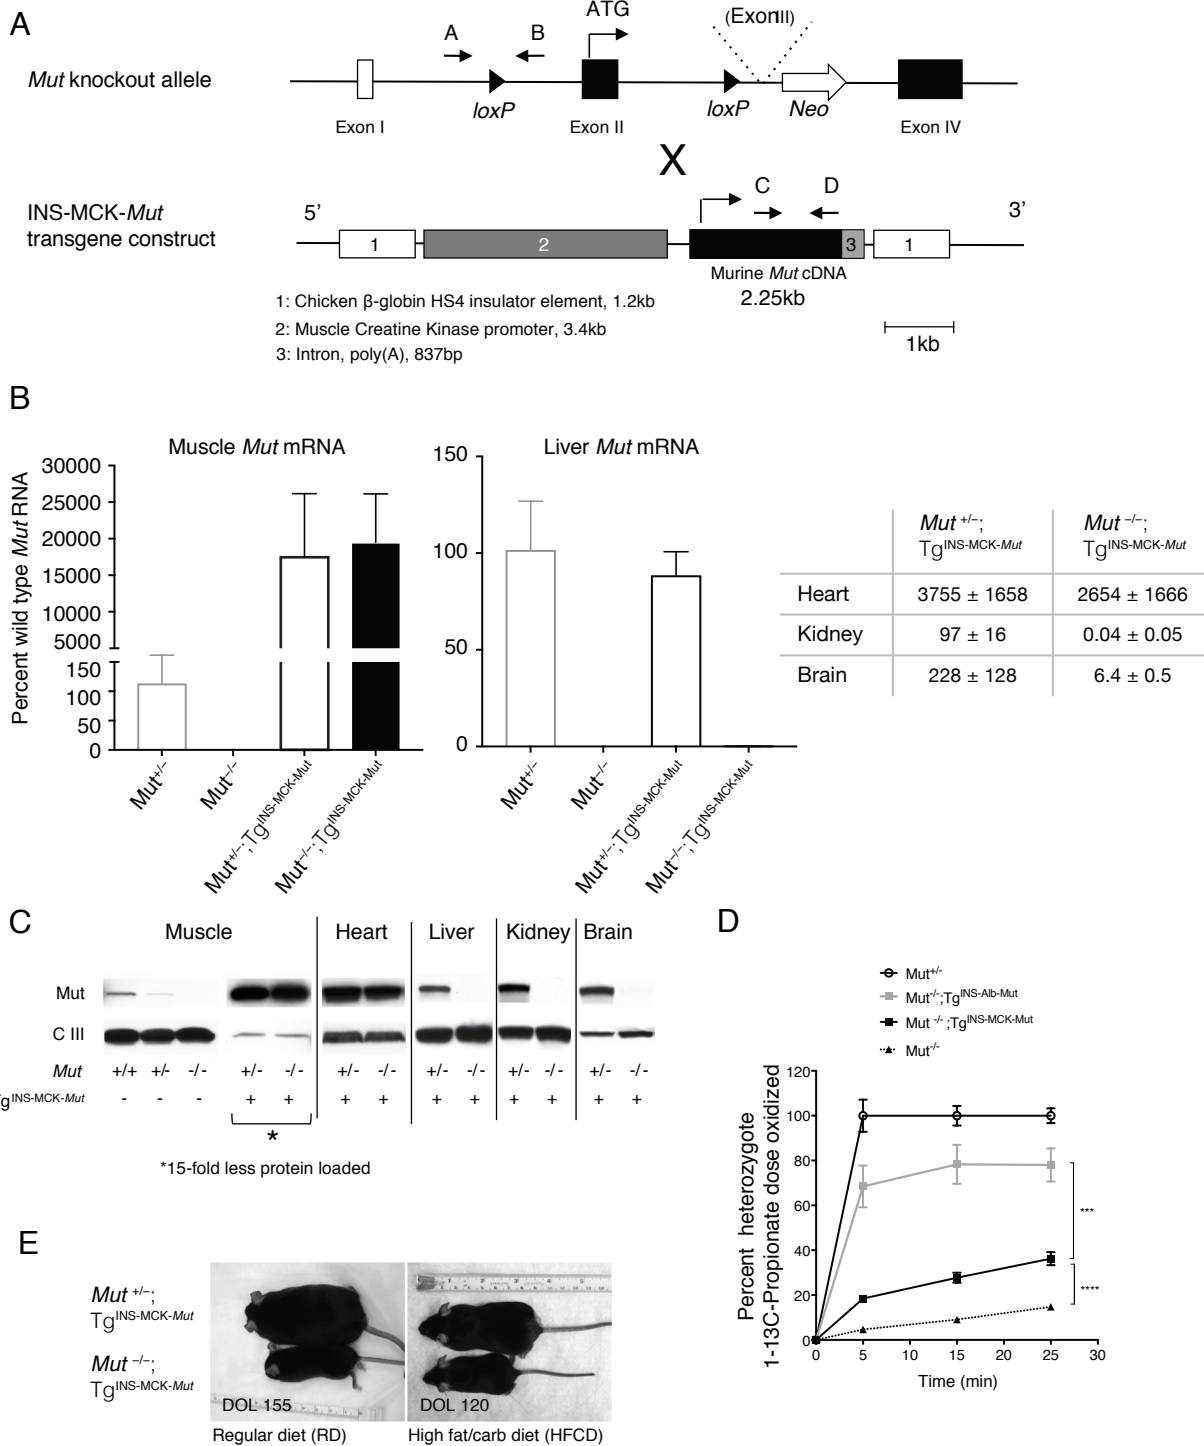

### Generation of the *Mut*<sup>-/-</sup>; Tg<sup>INS-MCK-Mut</sup> murine model.

(A) Schematic representation of the *Mut* knockout allele and the *INS-MCK-Mut* construct used to produce the transgenic model, *Mut*<sup>-/-</sup>; Tg<sup>INS-MCK-Mut</sup>. (B) Quantitative RT-PCR analysis of *Mut* mRNA expression in the muscle and liver. Results are provided as percentage of the levels obtained in wild-type (*Mut*<sup>+/+</sup>) animals, corrected for Gapdh expression (mean  $\pm$  SEM; n = 3–5; P = 0.0027). The muscle *Mut* mRNA expression from the transgene was 19,492.5  $\pm$  2,962.5 % and the heart was 2,654  $\pm$  1666 % compared to their *Mut*<sup>+/+</sup> littermates (P=0.0027, N=5), while there was no detectable *Mut* mRNA in the liver (0.0928  $\pm$  0.04 % compared to wild type), kidney or brain tissues. (C) Mut (78 kDa) was detected in whole-tissue lysates from *Mut*<sup>-/-</sup>; Tg<sup>INS-MCK-Mut</sup> muscle and heart, but not in liver, kidney or brain protein extracts. The Complex III subunit Core 2 used as a loading control indicates that 15-fold less protein was loaded for the muscle tissue in order to obtain a regular size band after chemiluminescence, because of the strength of the signal. (D) The liver transgenic model (*Mut*<sup>-/-</sup>; Tg<sup>INS-MCK-Mut</sup>) exhibits significant higher percent propionate oxidation (78.04  $\pm$  22.1% control) compared to the *Mut*<sup>-/-</sup>; Tg<sup>INS-MCK-Mut</sup> mice (36.2  $\pm$  7.1% control, P=0.0007). (E) At 3–4 mo of age, *Mut*<sup>-/-</sup>; Tg<sup>INS-MCK-Mut</sup> mice appear active and well, but are consistently smaller than heterozygote littermates, whether fed regular chow or a high fat and carbohydrate diet.

## Supplemental Figure 2

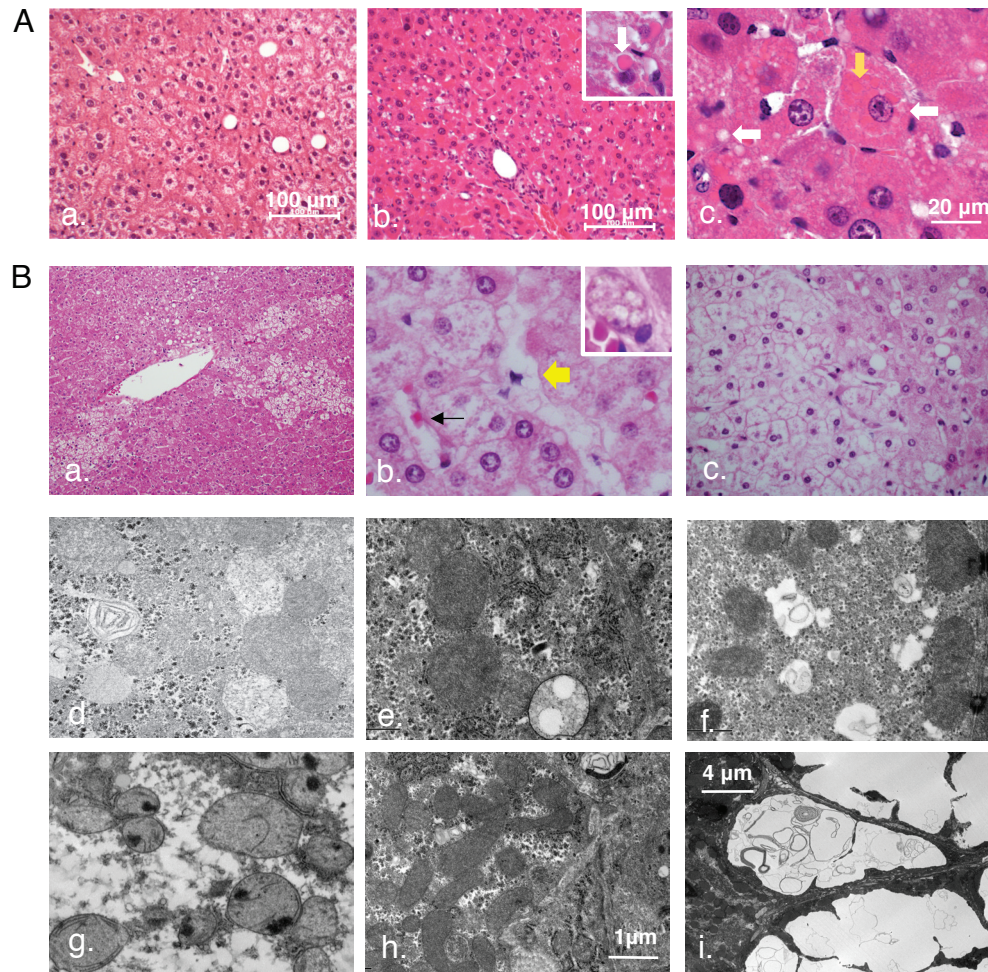

### Hepatic pathological and ultrastructural changes in $Mut^{-/-};Tg^{INS-MCK-Mut}$ animals and MMA patients

**(A)** Hepatic pathology in mutant mice (panel b) was notable for swollen hepatocytes with increased eosinophilia and scattered Mallory bodies (inset, panel b). Hepatocytes contained numerous cytoplasmic eosinophilic vacuoles consistent with megamitochondria (yellow arrow, panel c). Steatosis was observed in heterozygote animals reared on the same high fat and carbohydrate diet (panel a). No significant disruption of hepatic lobe architecture, fibrotic or cirrhotic changes were observed. Hematoxylin and eosin staining of liver sections from a 4-month old mice are shown, scale bars: 20-100 μm). **(B)** Explanted livers from patients undergoing a liver transplantation displayed mostly macrovesicular periportal steatosis, lipid laden stellate cells (panel b, yellow arrowhead) and occasional lipofuscin pigment granules (inset, panel b). Mitochondria with a reduction or loss of matrix density, unusual size/shape and shortened, disorganized cristae are invariably present in liver pathology examinations by electron microscopy (B, panels d-h). In some patients, liver ultrastructure revealed complex cytoplasmic structures with inclusions of various size and density engulfed by membranes suggestive of autophagosomes (B, panel i).



## Supplemental Figure 3

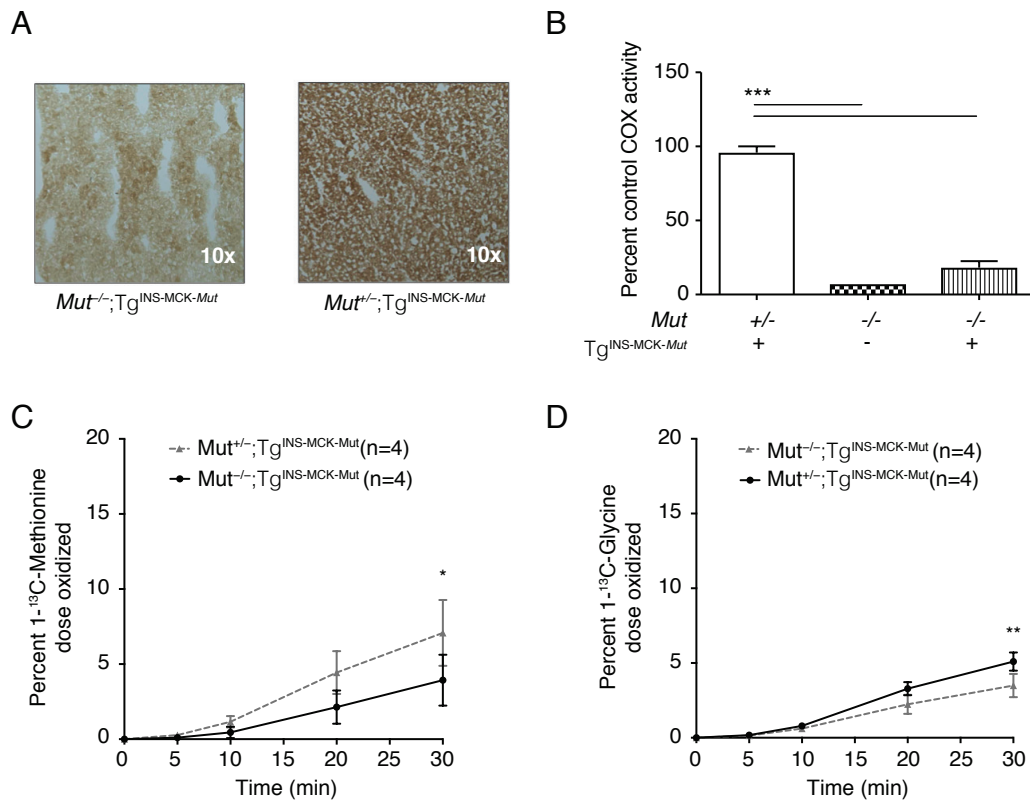

### Hepatic mitochondrial dysfunction.

(A) Immunohistochemistry for Cox and Sdh on liver section of mutant mice revealed significantly decrease in Cox staining (10x) compared to the heterozygote littermates. (B) Cytochrome c oxidase enzymatic activity in the livers of the *Mut<sup>+/-</sup>;Tg<sup>INS-MCK-Mut</sup>* mice were significantly lower than control mice, and similar to the *Mut<sup>+/-</sup>* livers (n=3 per group). (C and D) Cumulative percentage of total isotopomer dose metabolized in 30min after intraperitoneal injection of a tracer dose (10μl/g of [1mg/ml] tracer solution) is depicted for methionine and glycine 1-<sup>13</sup>C isotopomer. Oxidation of both amino acids was perturbed in the *Mut<sup>+/-</sup>;Tg<sup>INS-MCK-Mut</sup>* mice compared to their heterozygote littermates consistent with impaired activity of the glycine cleavage system and the mitochondrial steps of methionine metabolism caused by a shift in the NAD:NADH balance in the mitochondria.

## Supplemental Figure 4

A

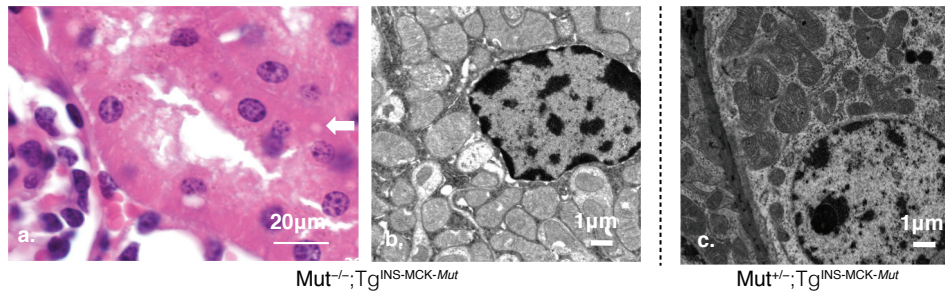

B

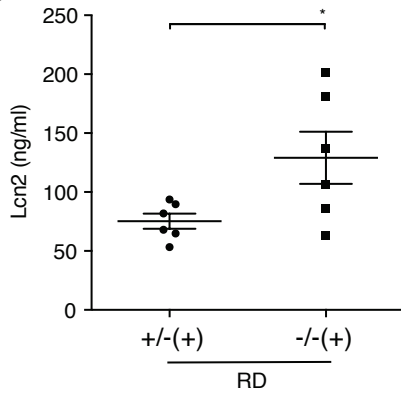

C

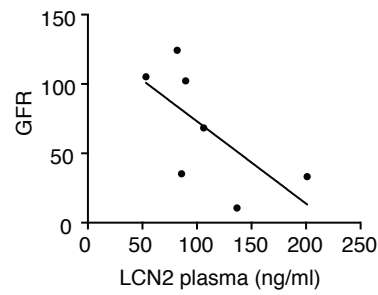

### Renal pathology in *Mut*<sup>-/-</sup>;Tg<sup>INS-MCK-Mut</sup> mice.

(A) Renal pathology showed mild interstitial nephritis and tubular vacuoles (white arrow) with accumulation of pigment in some proximal tubules' brush border (scale bars: 20μm, panel a). On electron microscopy, proximal tubules showed increased number of abnormally shaped mitochondria with decreased matrix density as opposed to their heterozygote littermates (scale bars: 1μm, panel b and c). (B) Plasma Lipocalin-2 (Lcn2) concentrations were elevated in *Mut*<sup>-/-</sup>;Tg<sup>INS-MCK-Mut</sup> mice on regular chow at 4-5 months of age compared to their heterozygote littermates (129.1 ± 22.09ng/ml vs 75.21 ± 6.41, *n*=6 each group, *P*=0.0413). (C) Plasma Lcn2 showed a negative trend with the glomerular filtration rate measured by the FITC inulin plasma decay method (*r* = -0.661, *R*<sup>2</sup>= 0.45, *P*=0.10).

## Supplemental Figure 5

A

| Serum<br>Chemistries  | Mut <sup>+/-</sup> ;Tg <sup>INS-MCK-Mut</sup> |       | Mut <sup>-/-</sup> ;Tg <sup>INS-MCK-Mut</sup> |       | P-value      |
|-----------------------|-----------------------------------------------|-------|-----------------------------------------------|-------|--------------|
|                       | mean                                          | SD    | mean                                          | SD    |              |
| <b>BUN</b>            | 14.8                                          | 2.6   | 14.5                                          | 4.1   | 0.862        |
| <b>Alkaline Phos.</b> | 56.4                                          | 16.8  | 107.8                                         | 35.1  | <b>0.009</b> |
| <b>ALT/GPT</b>        | 24.2                                          | 10.7  | 26.7                                          | 9.0   | 0.671        |
| <b>AST/GOT</b>        | 53.1                                          | 20.4  | 55.6                                          | 36.0  | 0.883        |
| <b>Amylase</b>        | 1614.7                                        | 512.3 | 1008.8                                        | 381.1 | <b>0.042</b> |
| <b>CK</b>             | 384.1                                         | 666.2 | 238.9                                         | 307.2 | 0.638        |
| <b>LDH</b>            | 478.3                                         | 144.1 | 580.0                                         | 365.2 | 0.540        |

B

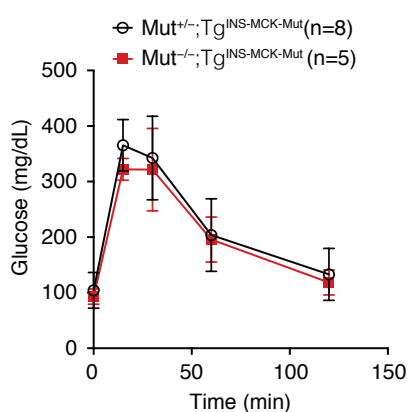

C

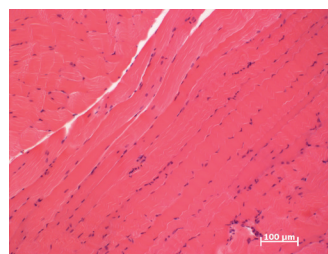

### Biochemical and other findings in Mut<sup>-/-</sup>;TgINS-MCK-Mut mice.

(A) Serum chemistries, including BUN, liver function testing, amylase, CK and LDH. Significant differences were only observed in alkaline phosphatase and amylase levels between Mut<sup>-/-</sup>;TgINS-MCK-Mut mice and their heterozygote littermates. (B) Two-hour glucose tolerance test in Mut<sup>-/-</sup>;TgINS-MCK-Mut mice, showed no difference in glucose control from heterozygote littermates on the same high fat/carbohydrate diet. (C) Hematoxylin-eosin stain of the quadriceps muscle shows no abnormal findings in Mut<sup>-/-</sup>;TgINS-MCK-Mut mice.

## Supplemental Figure 6

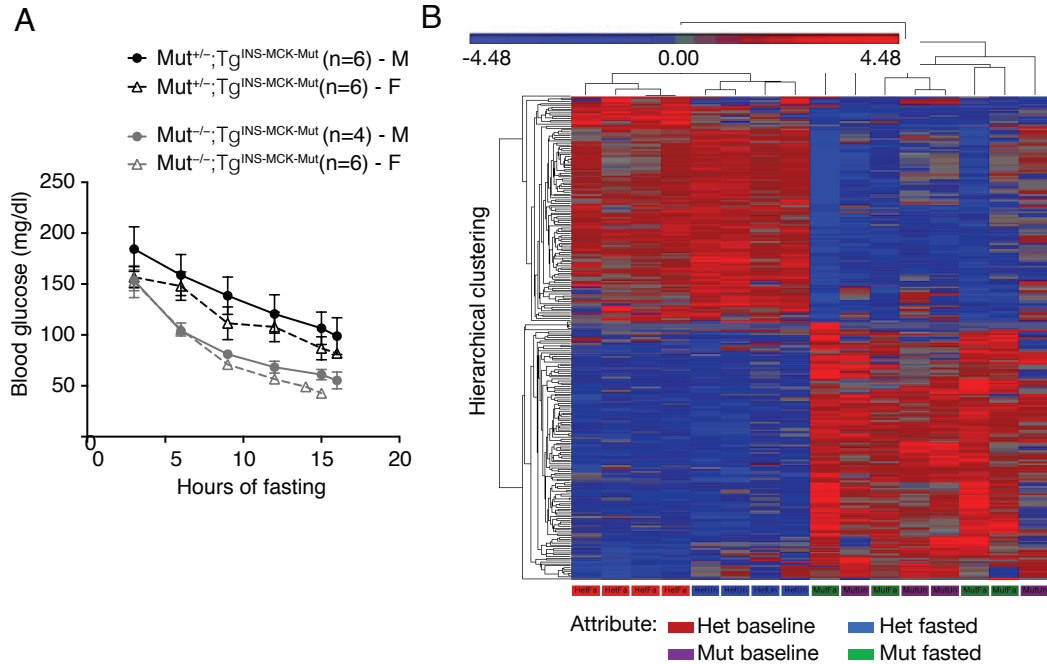

### Fasting challenge.

(A) Blood glucose monitoring during the overnight fasting study in male and female  $Mut^{+/-};Tg^{INS-MCK-Mut}$  mice detected hypoglycemia in the smaller female mice after 15-16hrs of fasting. Mice were euthanized for tissue collection at this time point. (B) The dendrogram represents hierarchical clustering of genes with similar expression pattern in the microarray experiments in liver tissues. Genes upregulated in the  $Mut^{+/-};Tg^{INS-MCK-Mut}$  mice as opposed to control animals are indicated in Red and downregulated in Blue. Microarrays were performed in 2 groups of animals, mutant and control mice, in two conditions, baseline and fasting states. The scale (red to blue) represents the ratios of differential expression based on signal intensity.

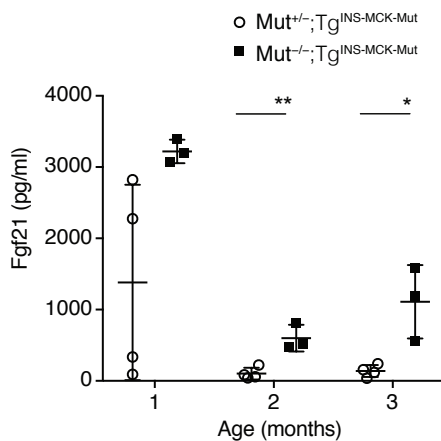

### Longitudinal Fgf21 values.

(C) Samples obtained in a small number over time suggest that values are higher at weaning, even for some heterozygote animals, and then gradually increase after the first month in the mutant transgenic mice.

## Supplemental Figure 7

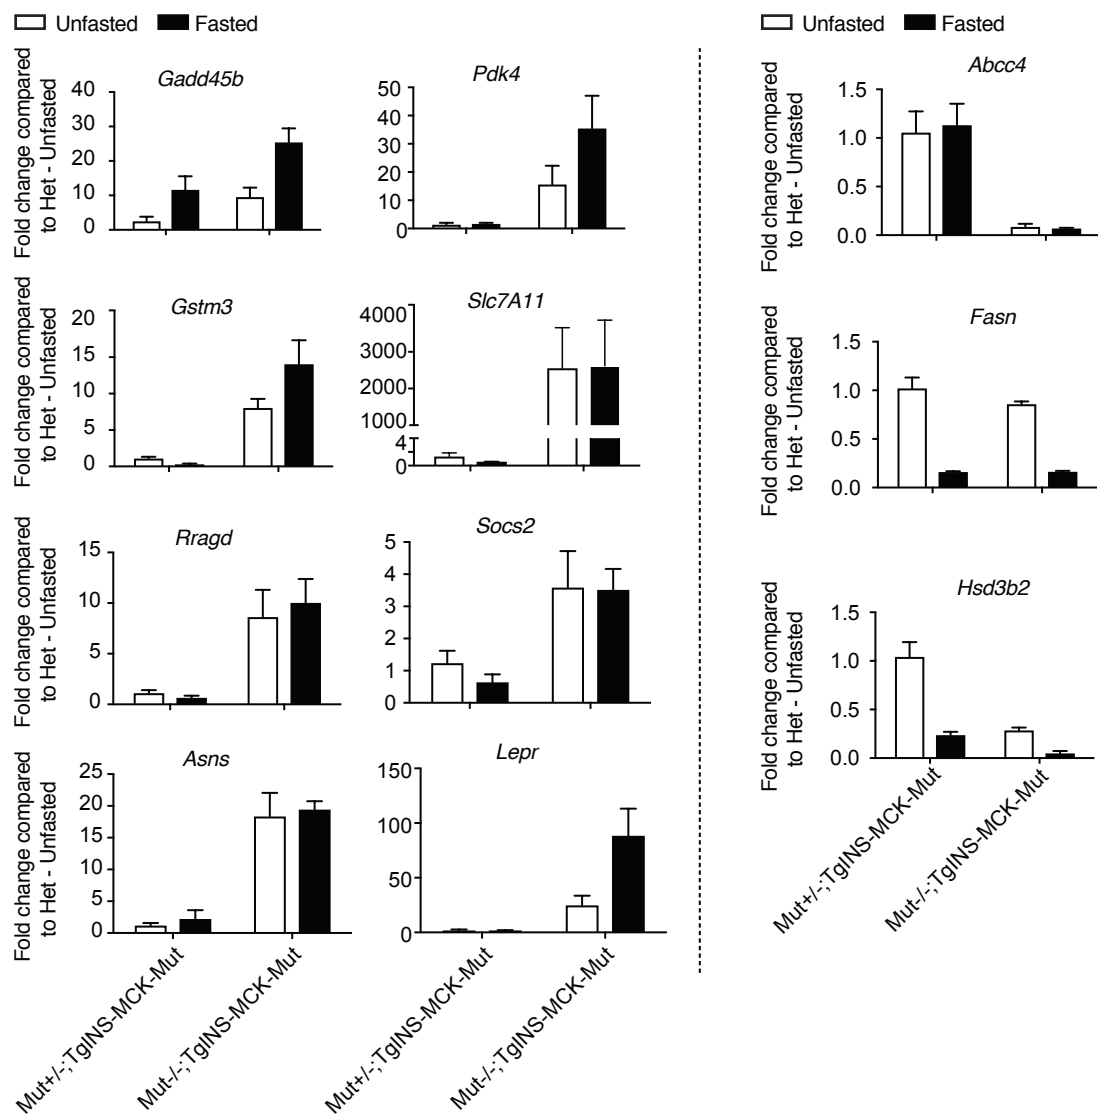

### Validation of selected up- and down-regulated genes in the microarray experiment

Hepatic expression of selected genes in the unfasted and fasted state in heterozygote and mutant animals is depicted. An exaggerated response was often seen in *Mut*<sup>+/-</sup>;Tg<sup>INS-MCK-Mut</sup> mice in several pathways (for example: *Gadd45b*, *Pdk4*), while for others a divergent response was observed, with genes that are normally downregulated being significantly induced (*Gstm3*, *Slc7A11*, *Rragd*). Downregulation of *Fasn* and *Hsd3b2* was consistent between *Mut*<sup>+/-</sup>;Tg<sup>INS-MCK-Mut</sup> and their heterozygote littermates.

# Supplemental Figure 8

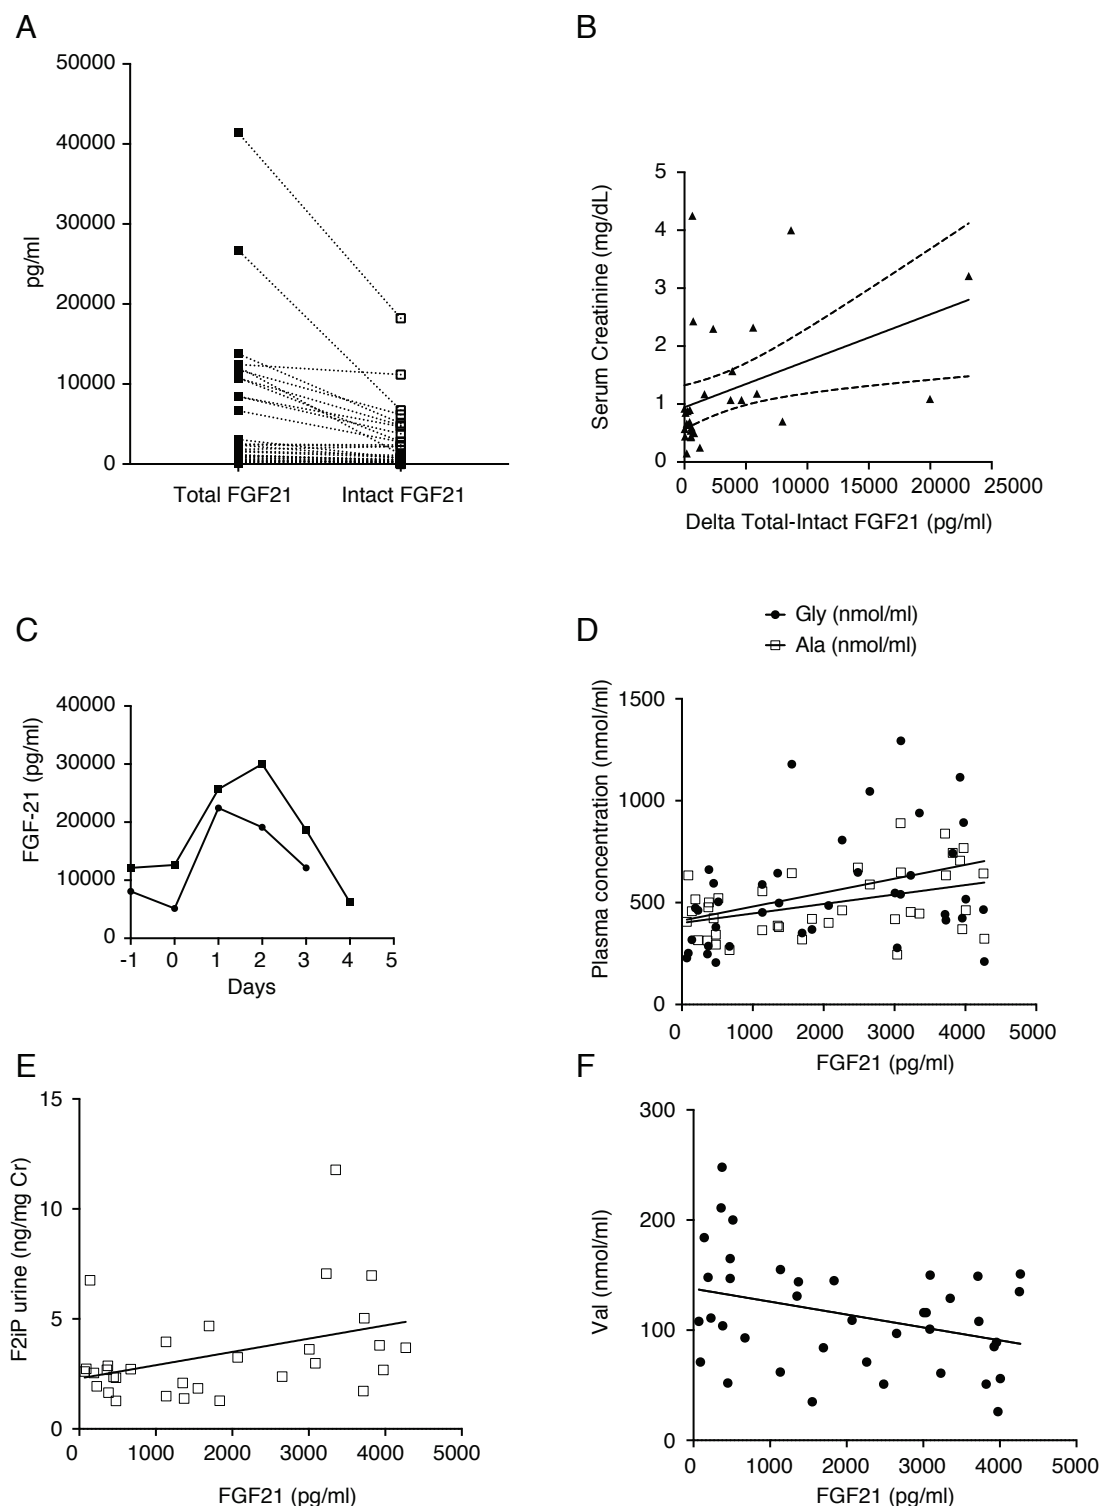

## Plasma total and intact FGF21 and correlations with other biochemical parameters.

(A) Total and intact (active) FGF21 were measured in the same samples (N=38). Intact FGF21 ranged from 33.92 to 18,235 pg/ml ( $2,262 \pm 3,636$ , mean  $\pm$  SD). (B) Delta Total-Intact FGF21 showed a weak correlation ( $R^2=0.18$ ,  $r=0.42$ ,  $P=0.014$ ) with renal function. (C) Serial FGF21 measurements before, during and after a metabolic crisis in two MMA siblings showed massive temporary increases in serum FGF21 concentrations that returned to pre-crisis levels upon recovery. (D) Plasma FGF21 correlated positively with plasma amino acids (glycine:  $r=0.36$ ,  $P=0.0227$ ,  $R^2=0.132$  and alanine:  $r=0.41$ ,  $P=0.0079$ ,  $R^2=0.175$ , solid circles vs. clear square symbols, respectively), as well as (E) with urinary F2-isoprostanes ( $r=0.39$ ,  $P=0.03$ ,  $R^2=0.154$ ). (F) There was a negative correlation with plasma valine ( $r=-0.345$ ,  $P=0.03$ ,  $R^2=0.12$ ).
